# Supplementary material for: Synthesis and characterization of fluorinated azadipyrromethene complexes as acceptors for organic photovoltaics
Source: publisher site journal article supplement (doi:10.3762/bjoc.12.182), 2016-08-29
Supplement: Additional file 1 [file 1860-5397-12-182-S1.pdf]

**Supporting Information**

**for**

**Synthesis and characterization of fluorinated  
azadipyrromethene complexes as acceptors for  
organic photovoltaics**

Forrest S. Etheridge<sup>1</sup>, Roshan J. Fernando<sup>1</sup>, Sandra Pejić<sup>1</sup>, Matthias Zeller<sup>2</sup> and  
Geneviève Sauvé<sup>\*,1</sup>

Address: <sup>1</sup>Department of Chemistry, Case Western Reserve University, Cleveland,  
Ohio 44106, United States and <sup>2</sup>Department of Chemistry, Purdue University,  
West Lafayette, Indiana 47907, United States

Email: Geneviève Sauvé\* - [genevieve.sauve@case.edu](mailto:genevieve.sauve@case.edu)

\*Corresponding author

**NMR and MS data**

This includes all <sup>1</sup>H, <sup>13</sup>C, and <sup>19</sup>F NMR as well as MALDI-TOF MS spectra for  
the compounds in order of appearance in the experimental section in the main text.

# L1-ADP

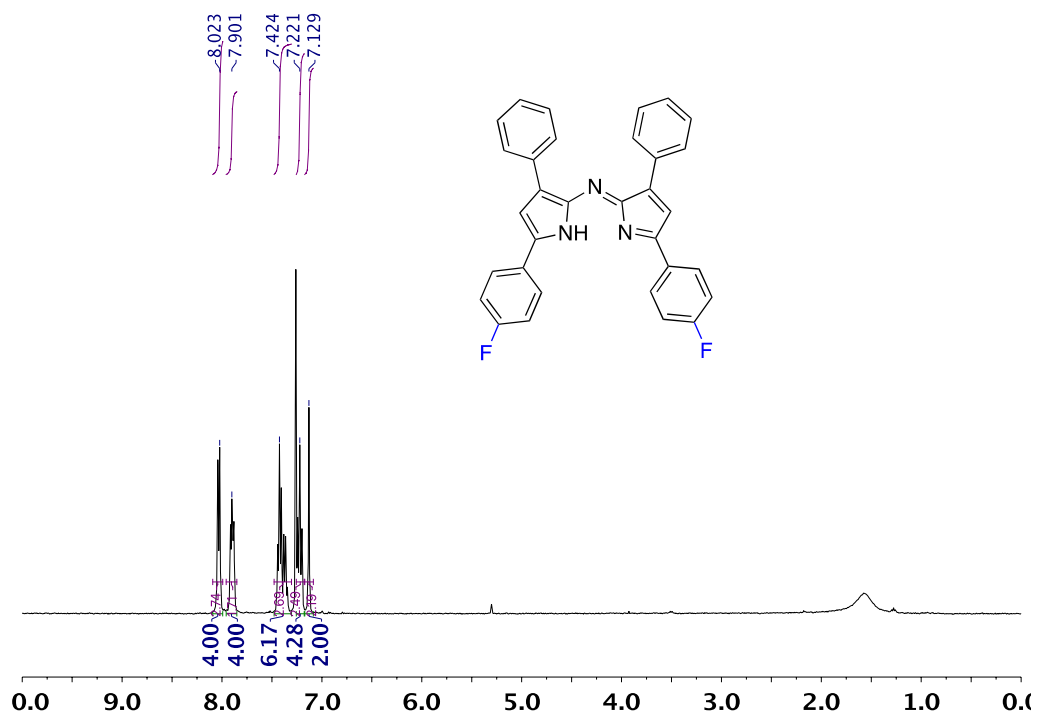

Figure S1 <sup>1</sup>H NMR of L1-ADP

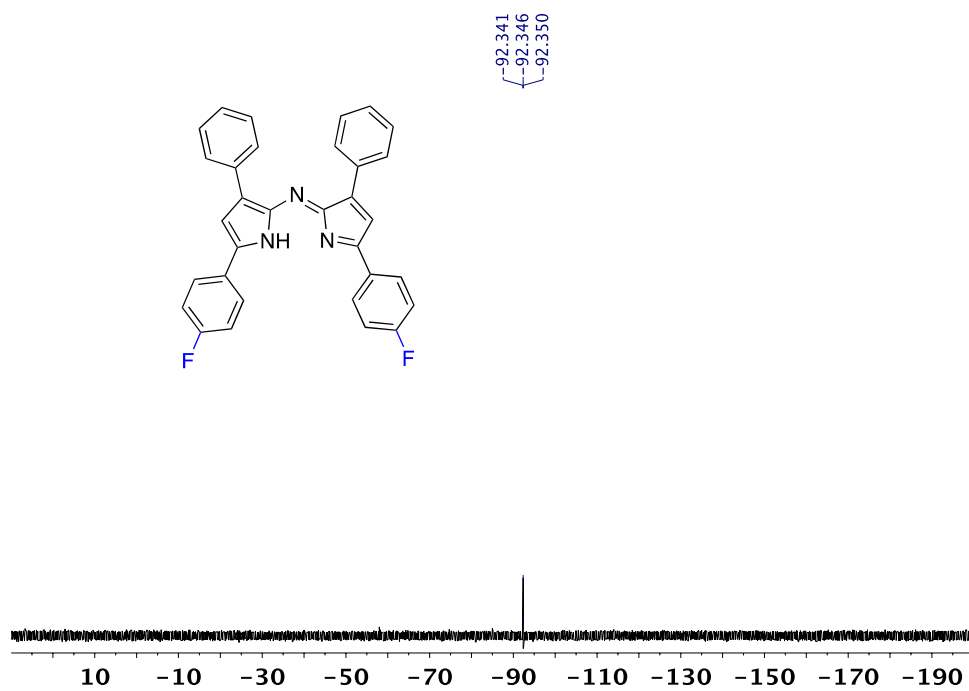

Figure S2 <sup>19</sup>F NMR of L1-ADP

## L2-ADP

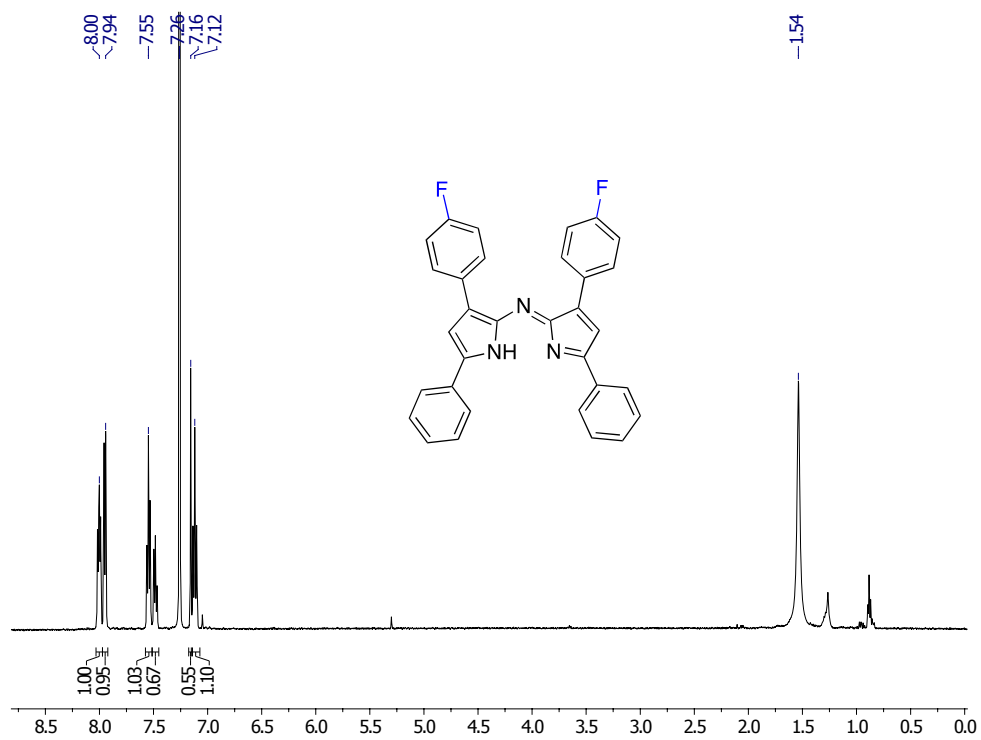

Figure S3 <sup>1</sup>H NMR of L2-ADP

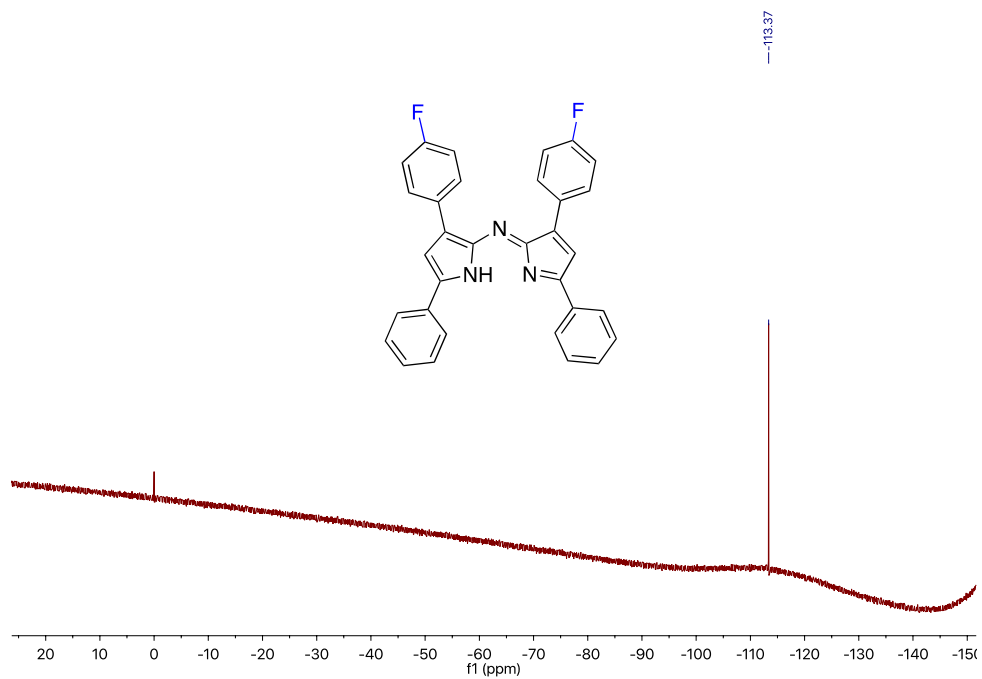

Figure S4 <sup>19</sup>F NMR of L2-ADP

# L1-ADPI<sub>2</sub>

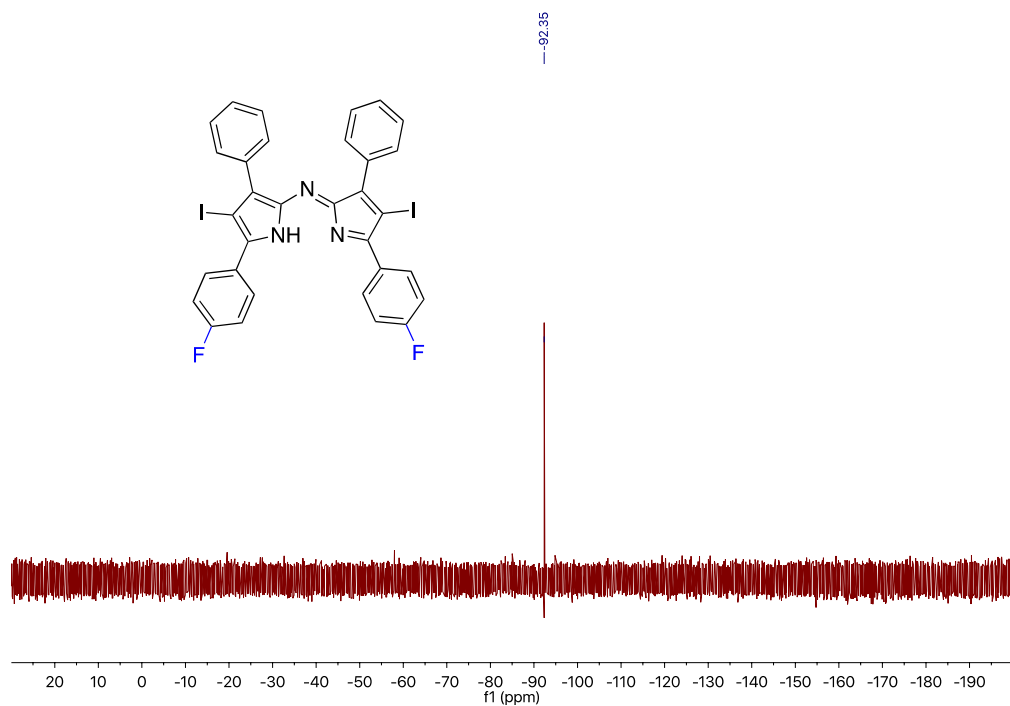

Figure S5 <sup>19</sup>F NMR of L1-ADPI<sub>2</sub>

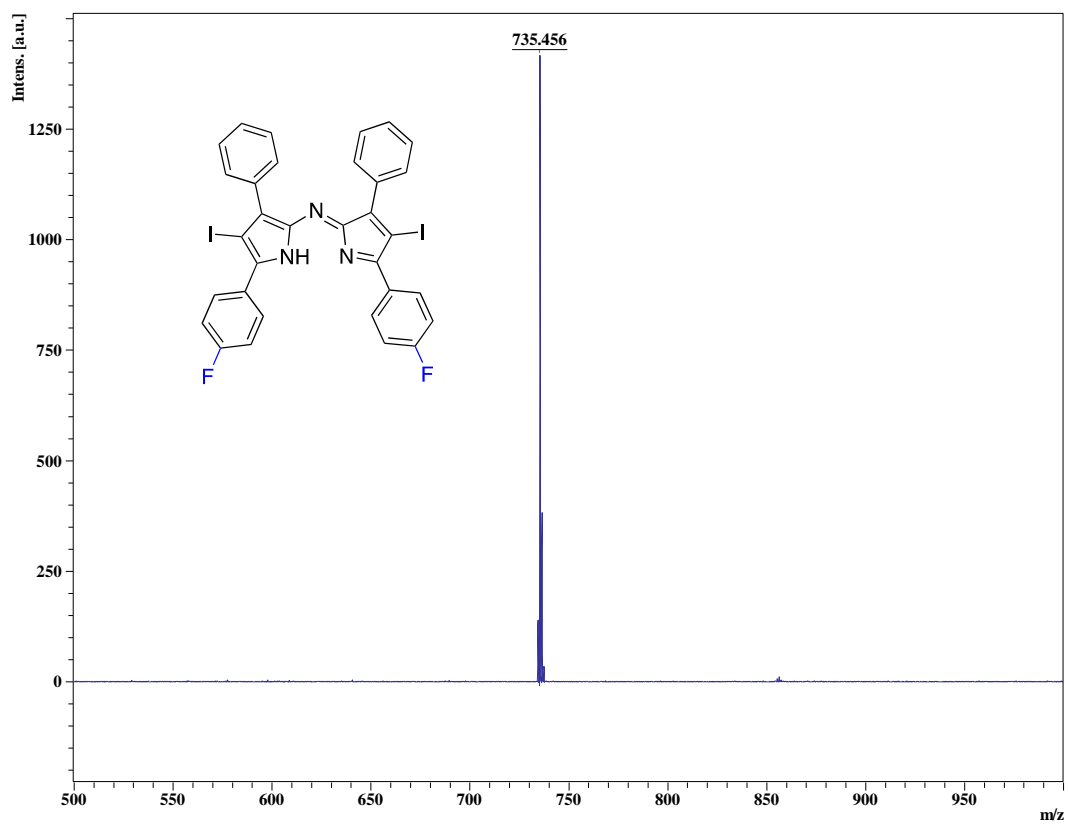

Figure S6 MALDI-TOF MS of L1-ADPI<sub>2</sub>

## L2-ADPI<sub>2</sub>

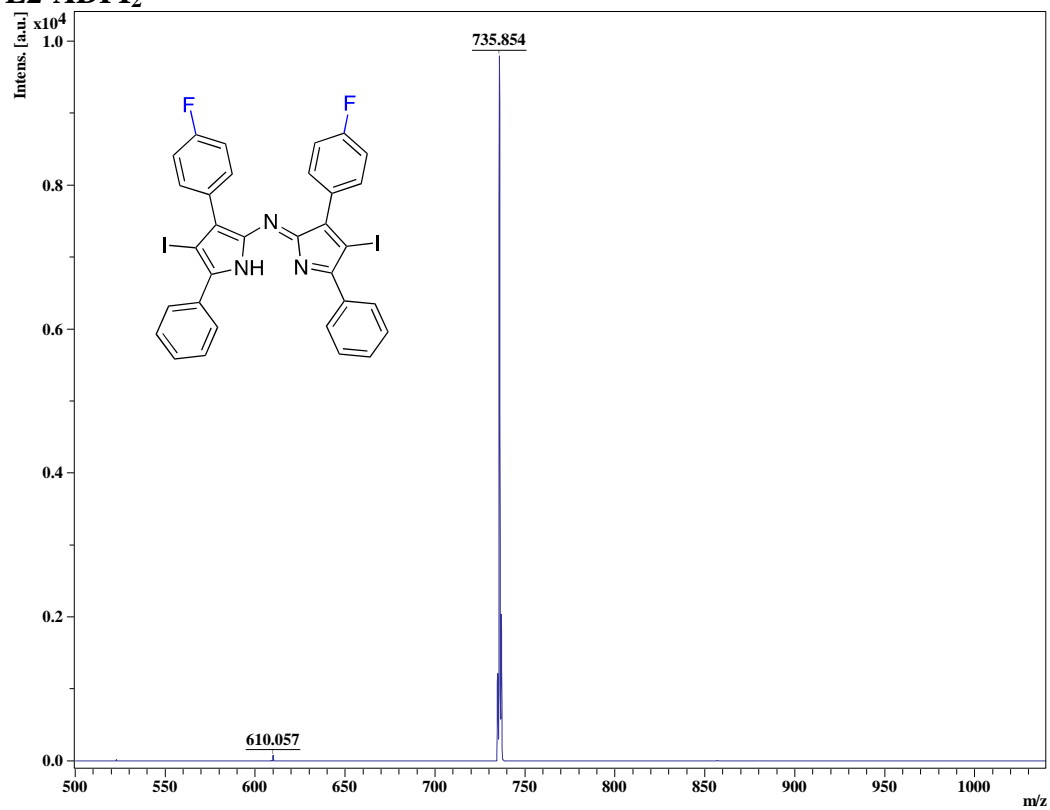

Figure S7 MALDI-TOF MS of L2-ADPI<sub>2</sub>

**L1**

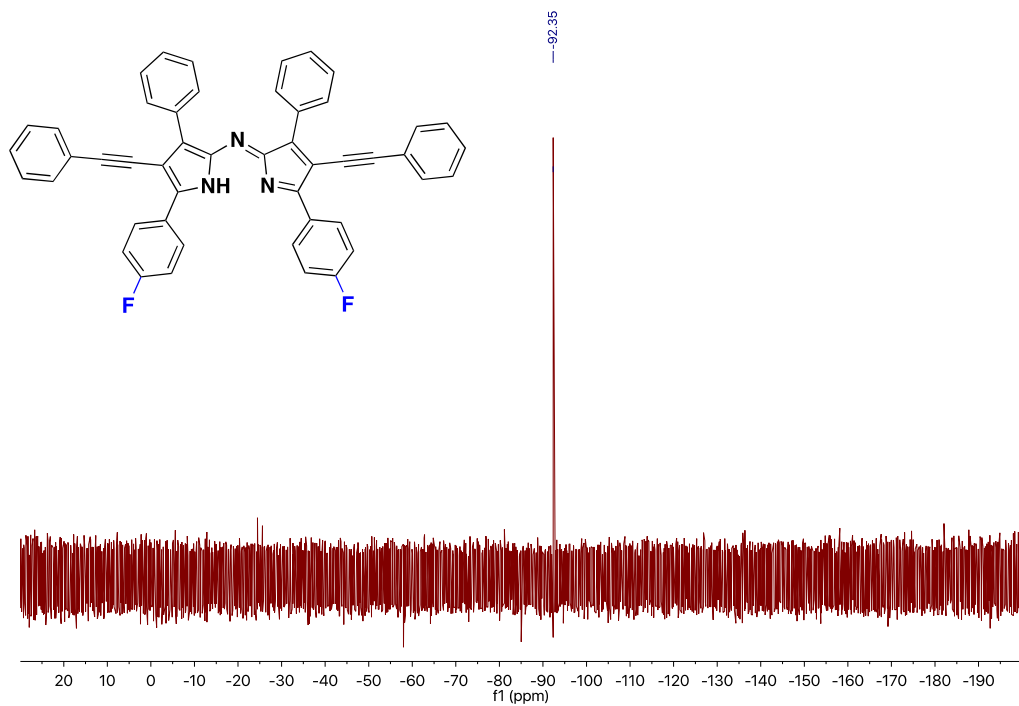

**Figure S8**  $^{19}\text{F}$  NMR of L1

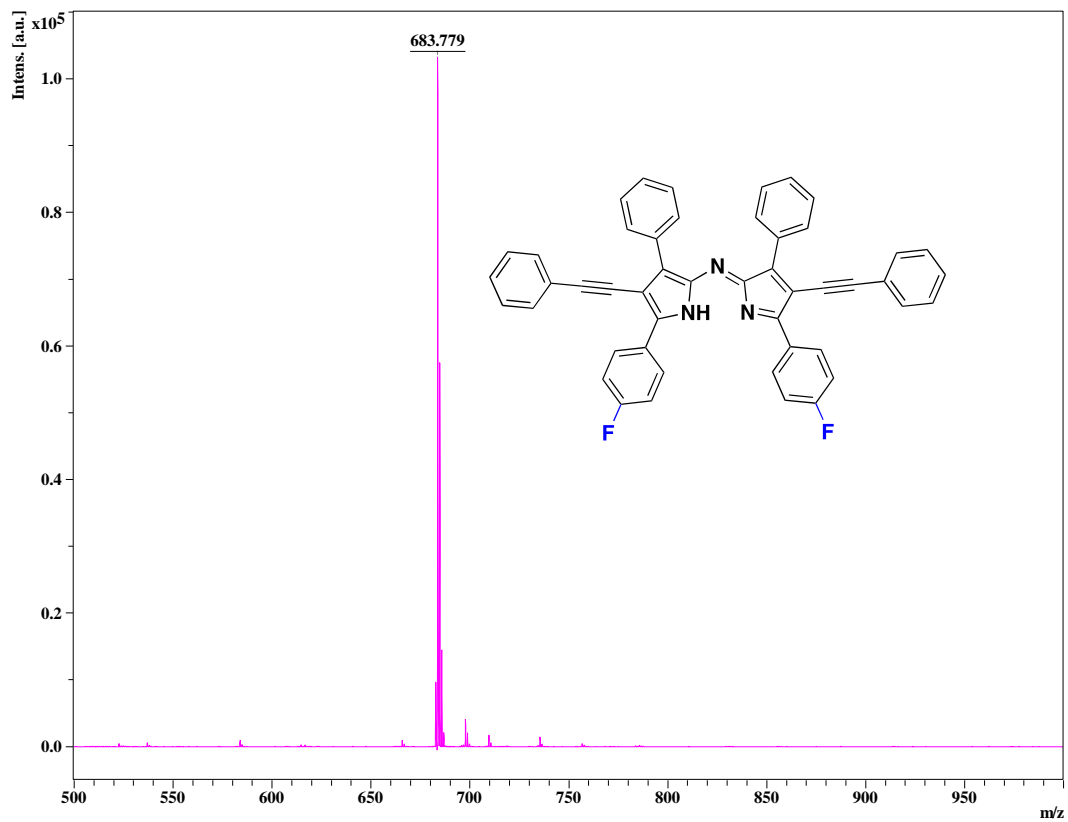

**Figure S9** MALDI-TOF MS of L1

**L2**

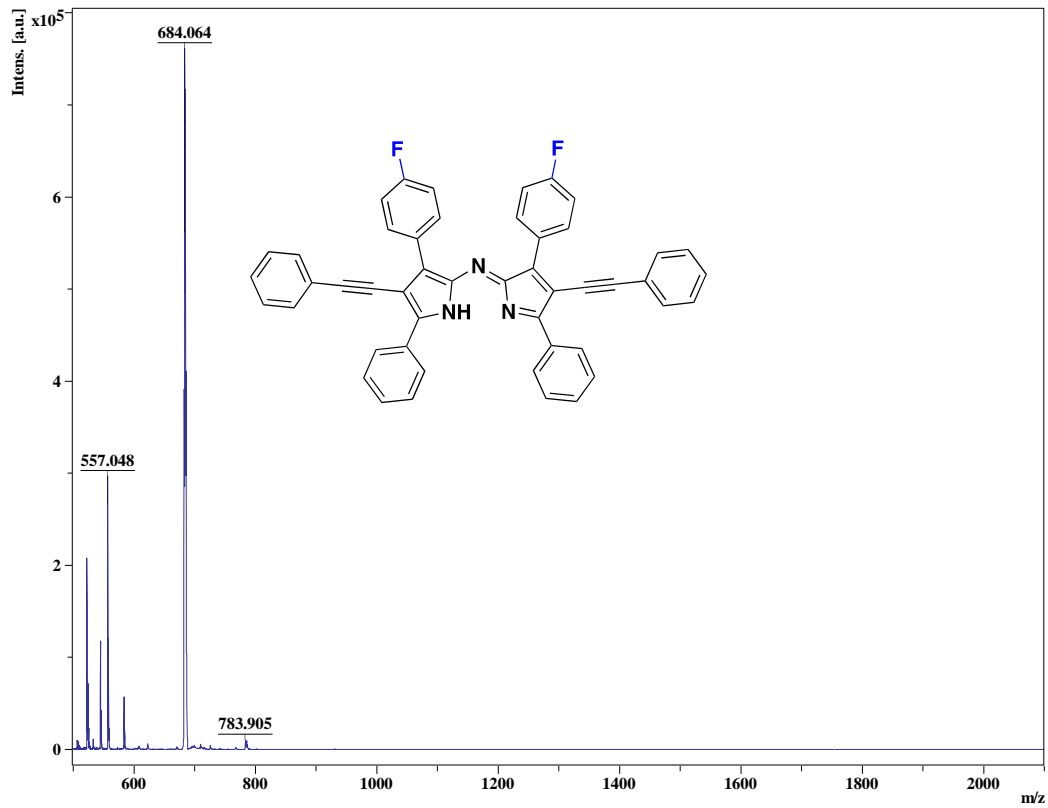

**Figure S10** MALDI-TOF MS of L2

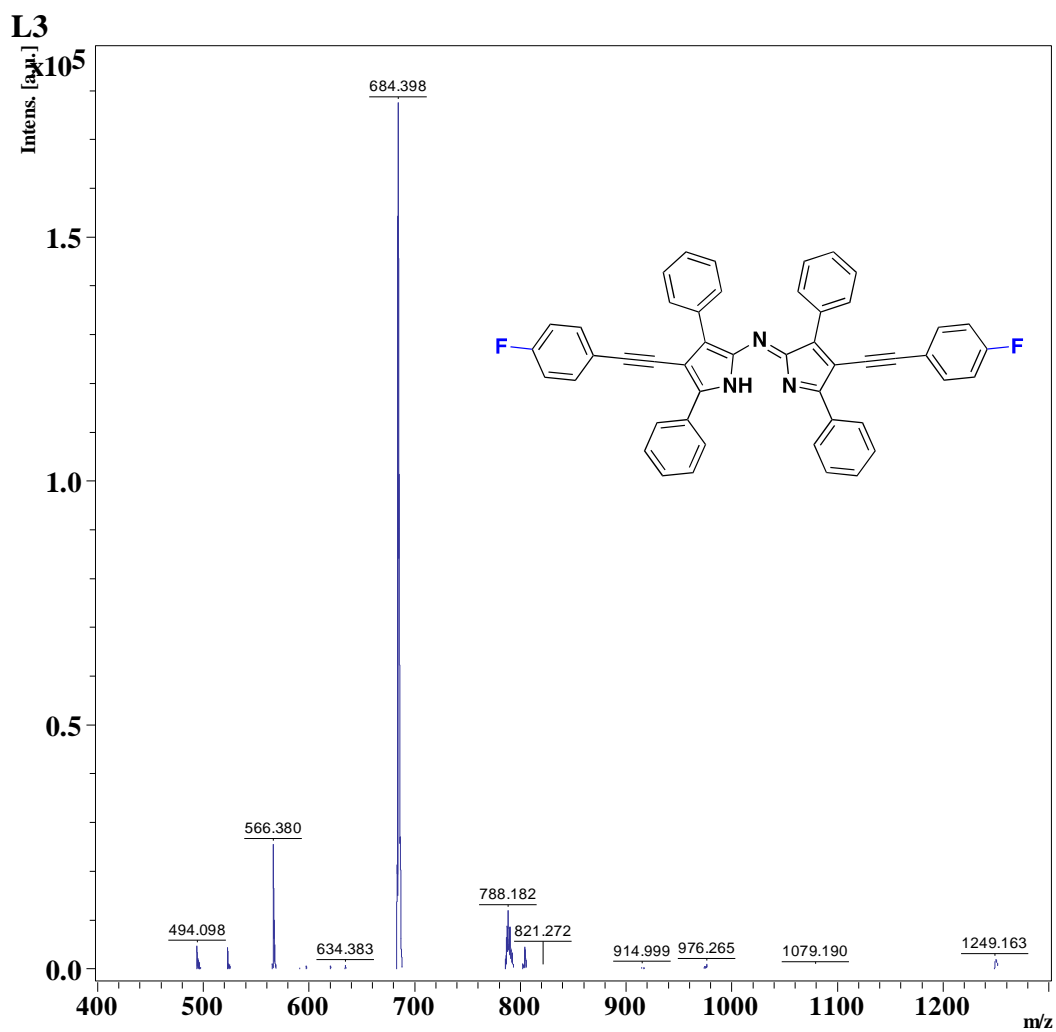

Figure S11 MALDI-TOF MS of L3



**L4**

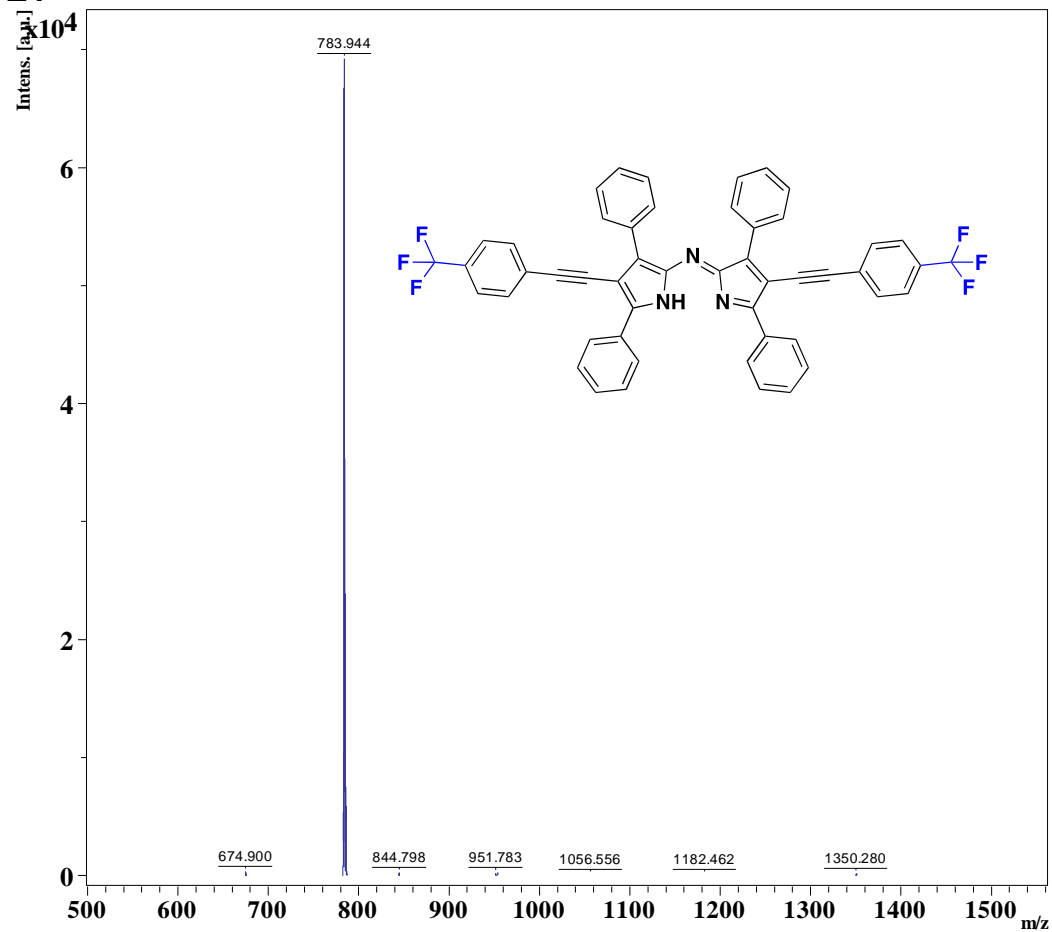

**Figure S12** MALDI-TOF MS of L4

### BF<sub>2</sub>(L1)

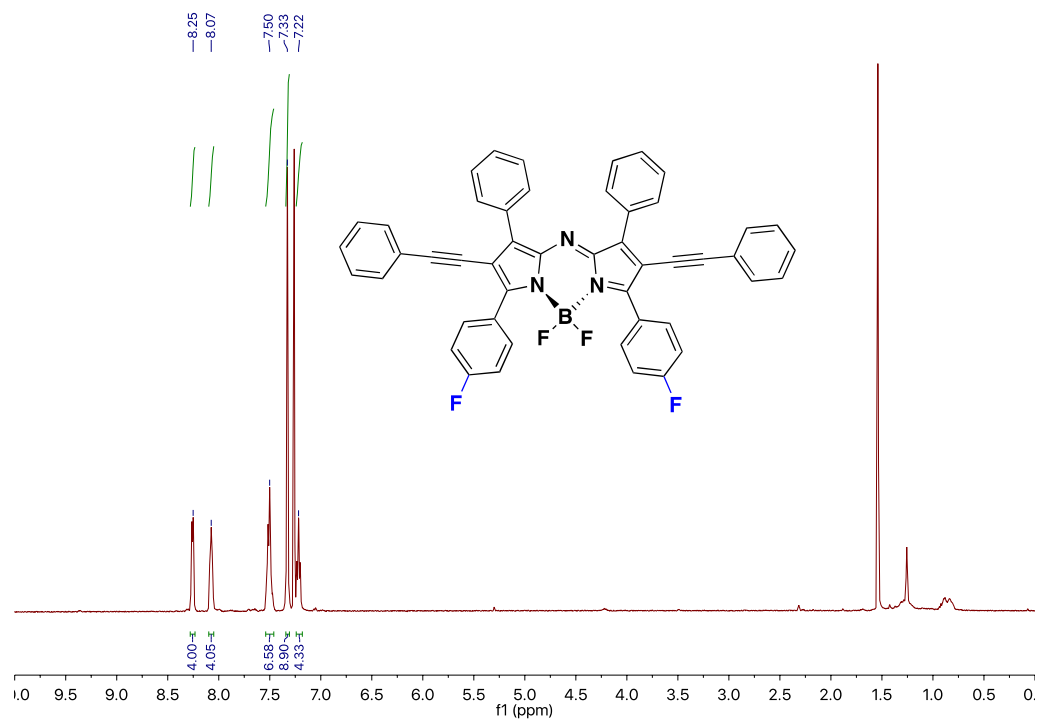

Figure S13 <sup>1</sup>H NMR of BF<sub>2</sub>(L1)

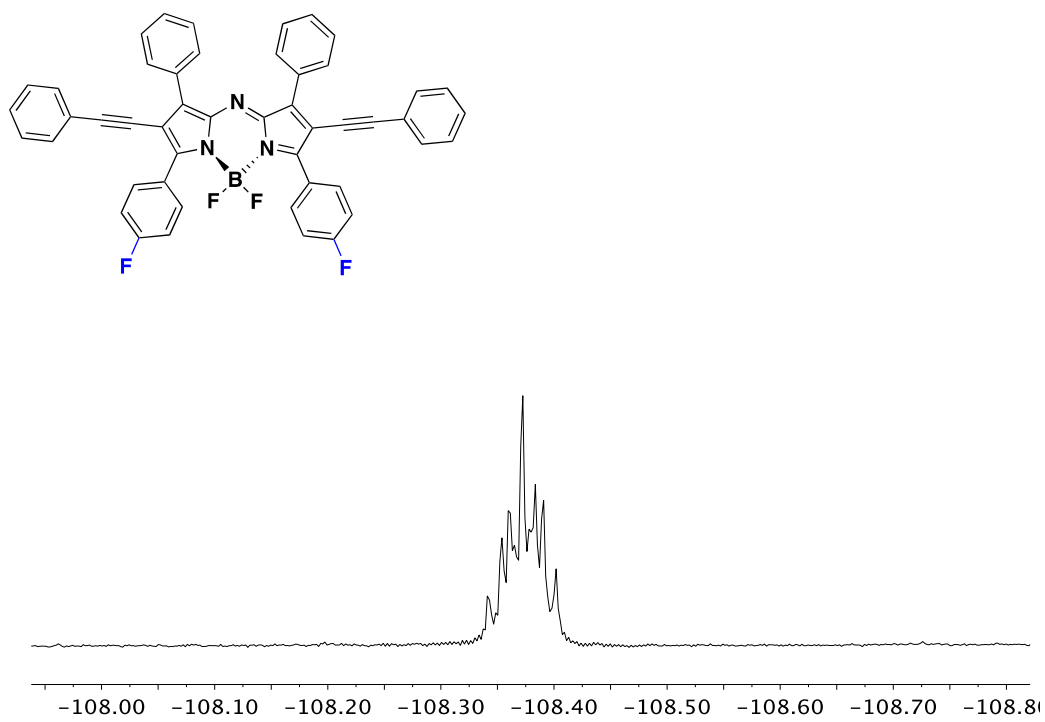

Figure S14 <sup>19</sup>F NMR of BF<sub>2</sub>(L1)

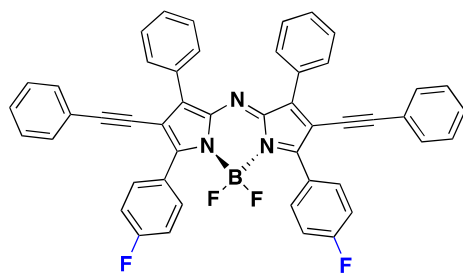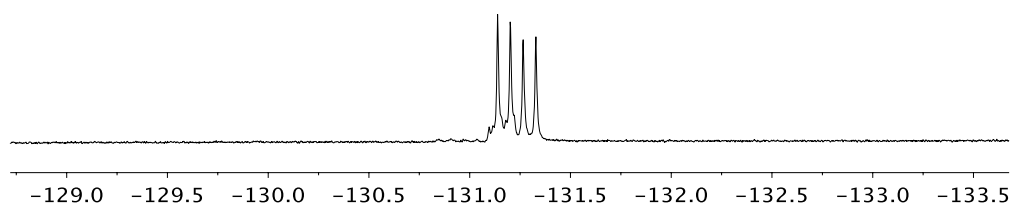

**Figure S15**  $^{19}\text{F}$  NMR of  $\text{BF}_2(\text{L1})$ ,  $\text{BF}_2$  peaks

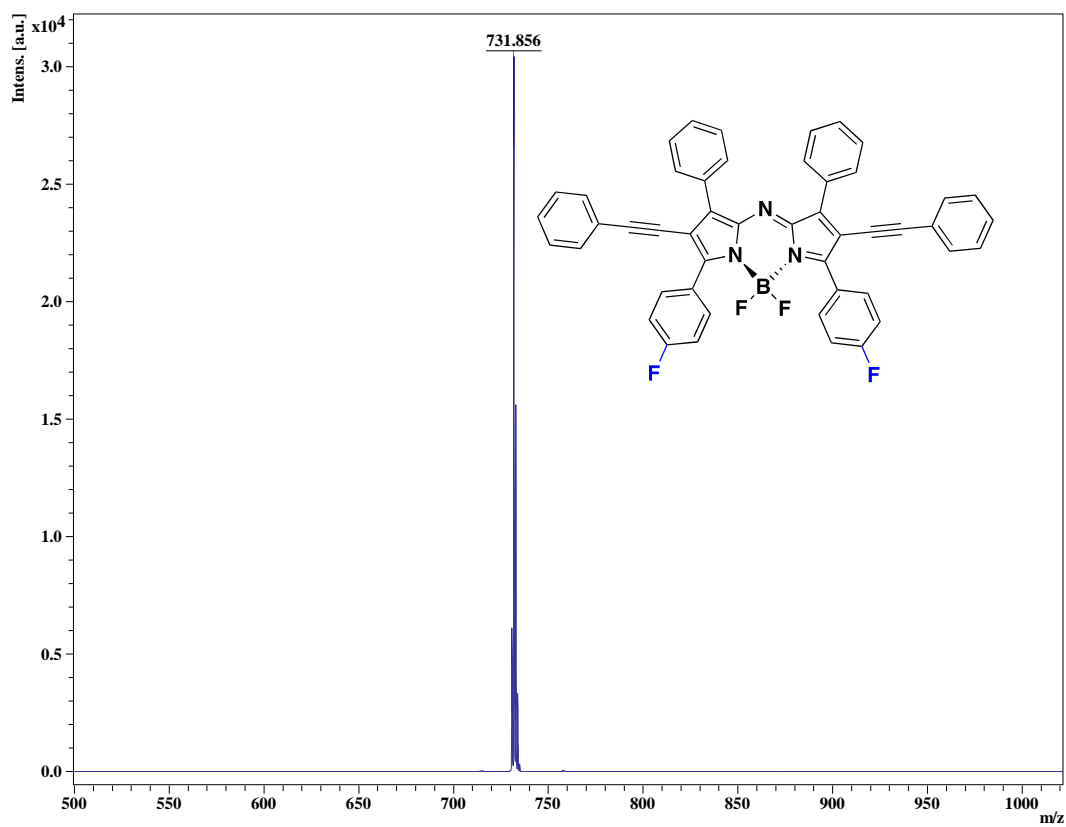

**Figure S16** MALDI-TOF MS of  $\text{BF}_2(\text{L1})$

**BF<sub>2</sub>(L3)**

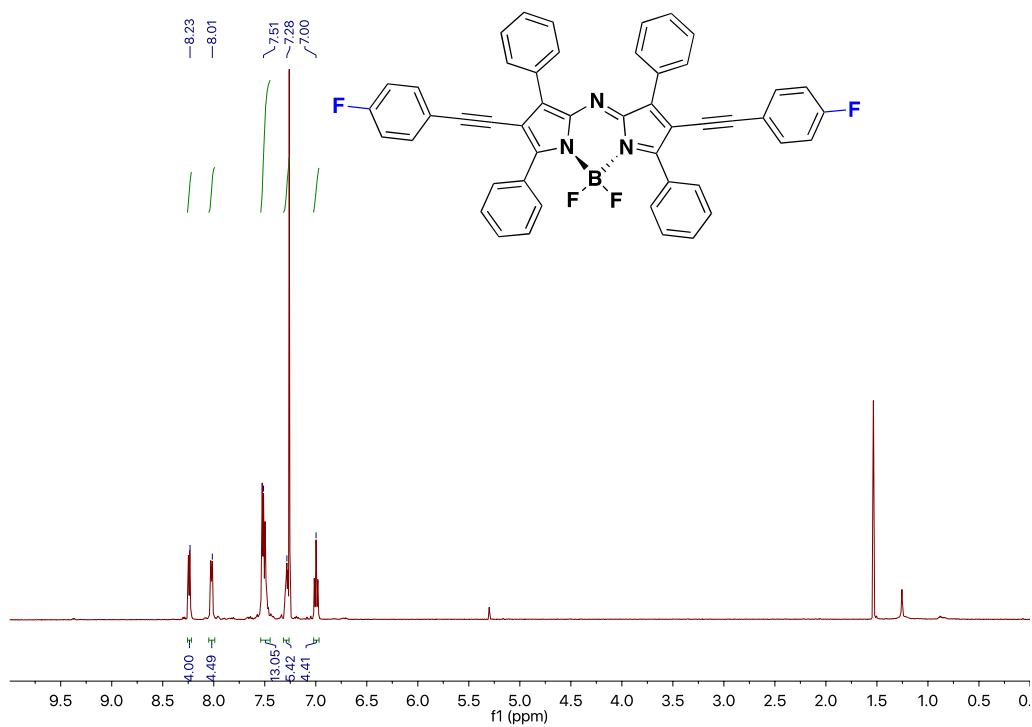

**Figure S17** <sup>1</sup>H NMR of BF<sub>2</sub>(L3)

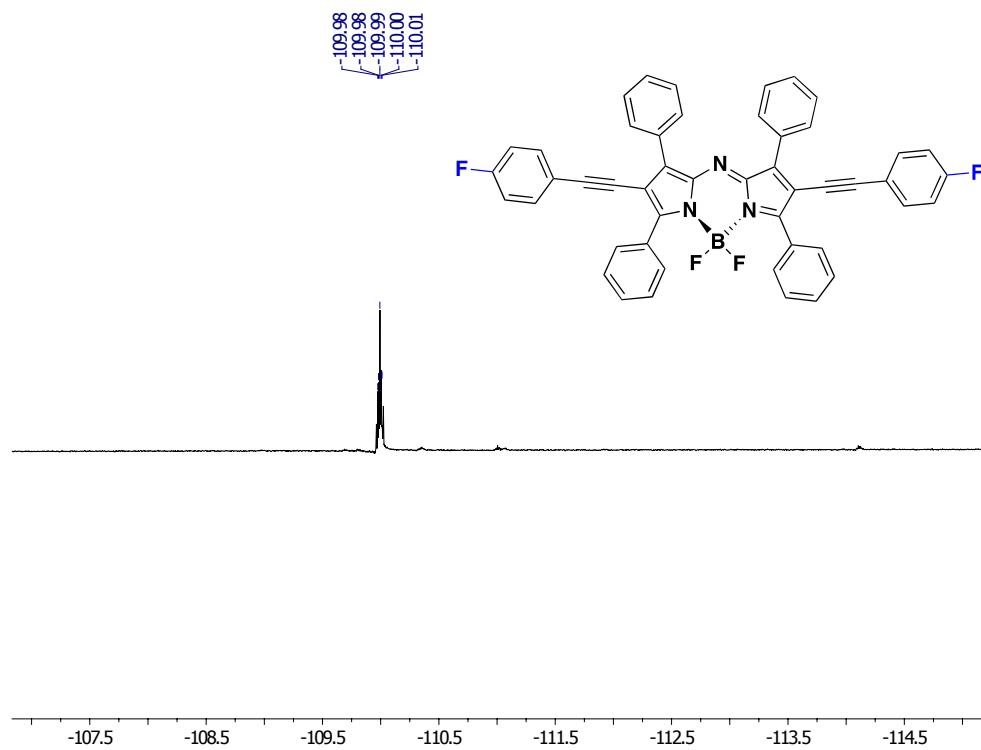

**Figure S18** <sup>19</sup>F NMR of BF<sub>2</sub>(L3)

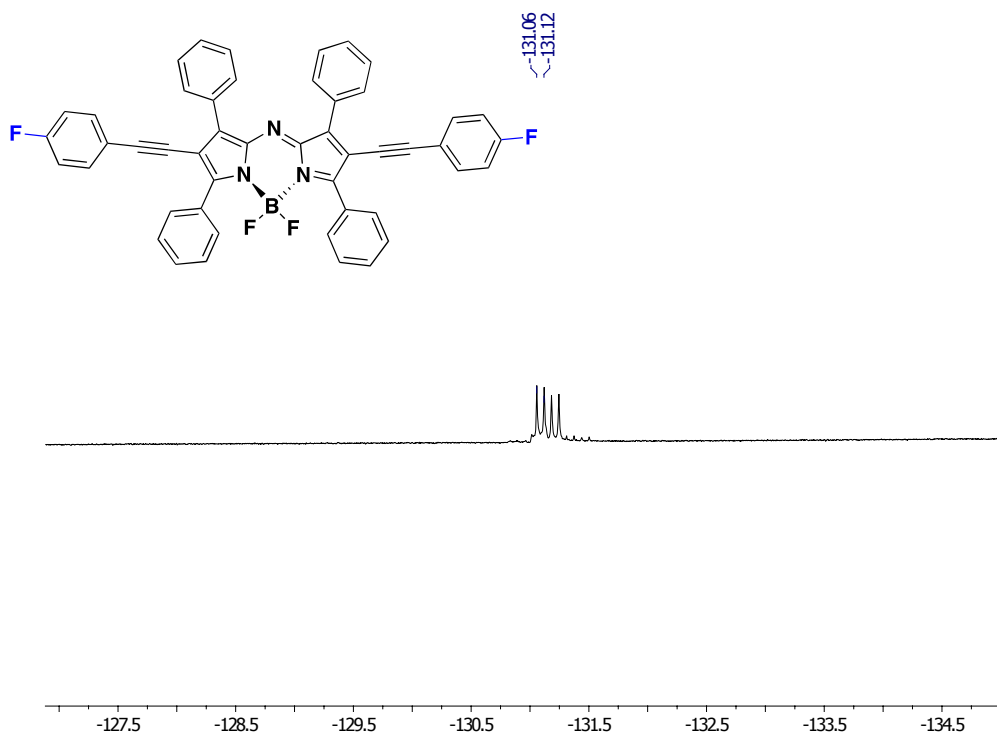

**Figure S19** <sup>19</sup>F NMR of BF<sub>2</sub>(L3), BF<sub>2</sub> peaks

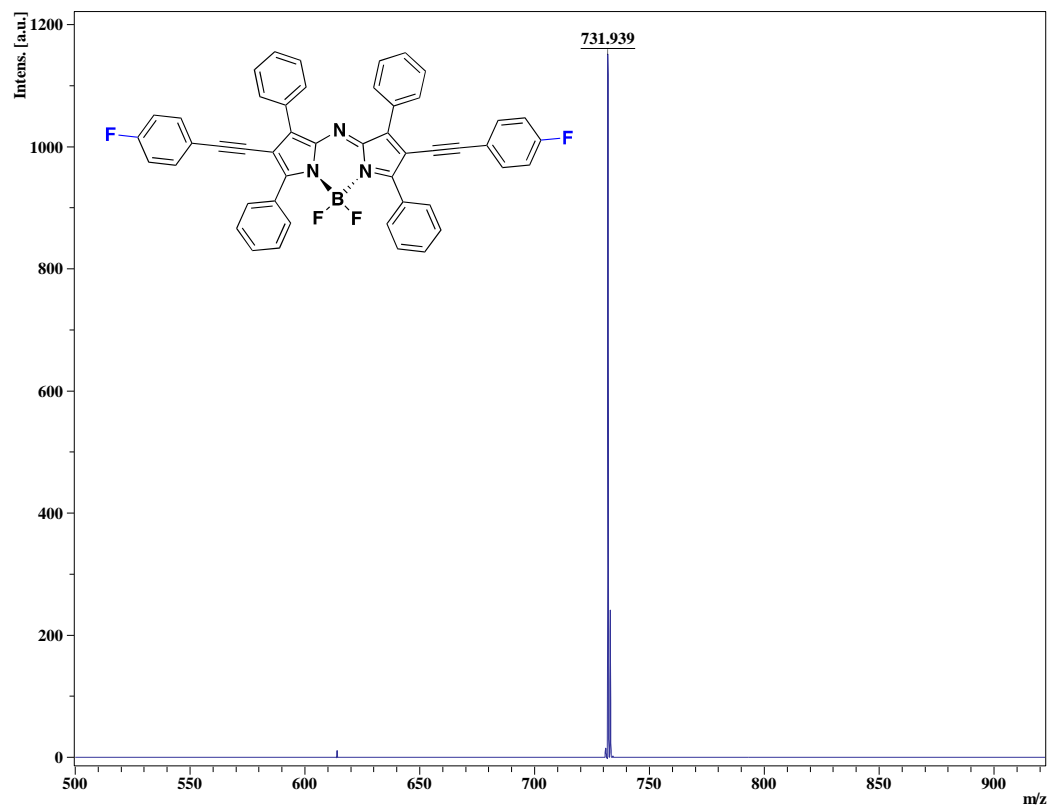

**Figure S20** MALDI-TOF MS of BF<sub>2</sub>(L3)

**BF<sub>2</sub>(L4)**

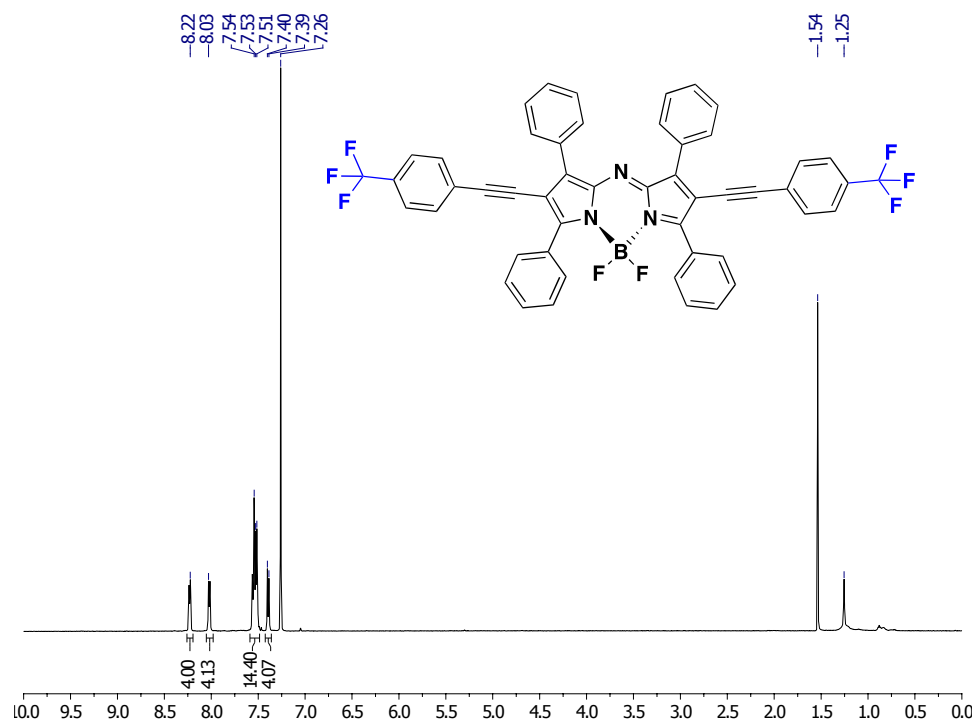

**Figure S21** <sup>1</sup>H NMR of BF<sub>2</sub>(L4)

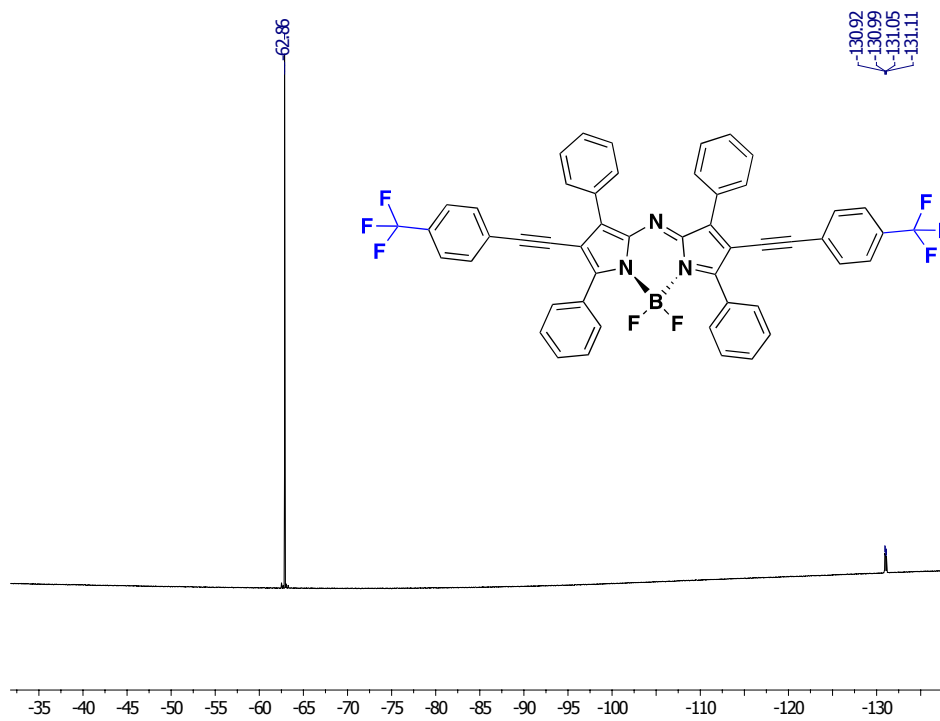

**Figure S22** <sup>19</sup>F NMR of BF<sub>2</sub>(L4)

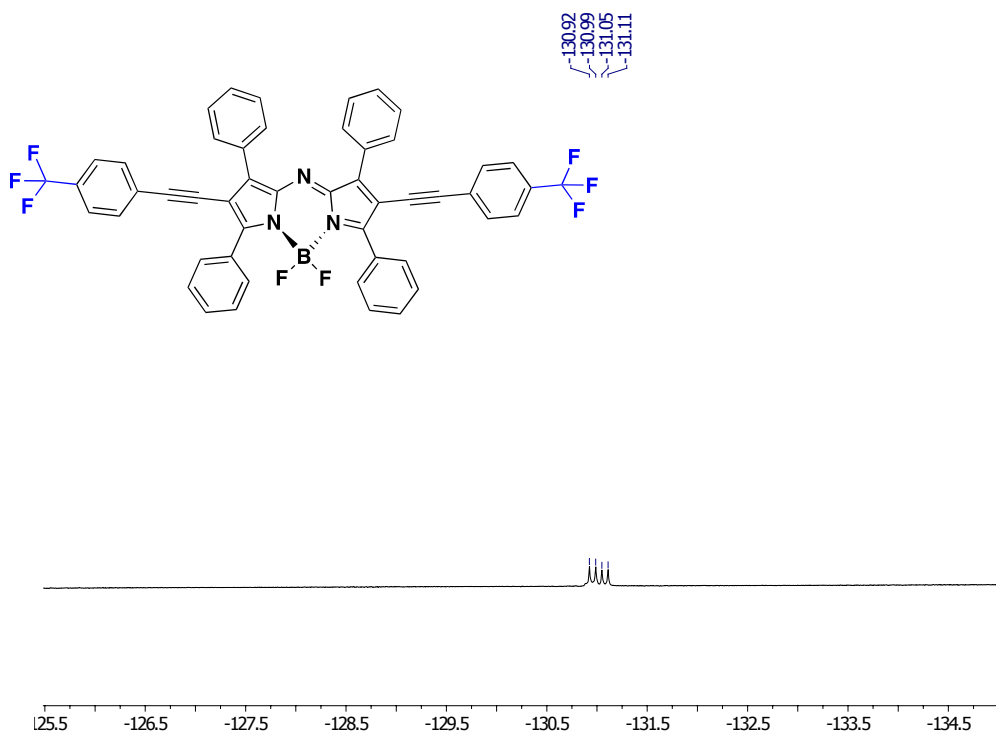

**Figure S23** <sup>19</sup>F NMR of BF<sub>2</sub>(L4), BF<sub>2</sub> peaks

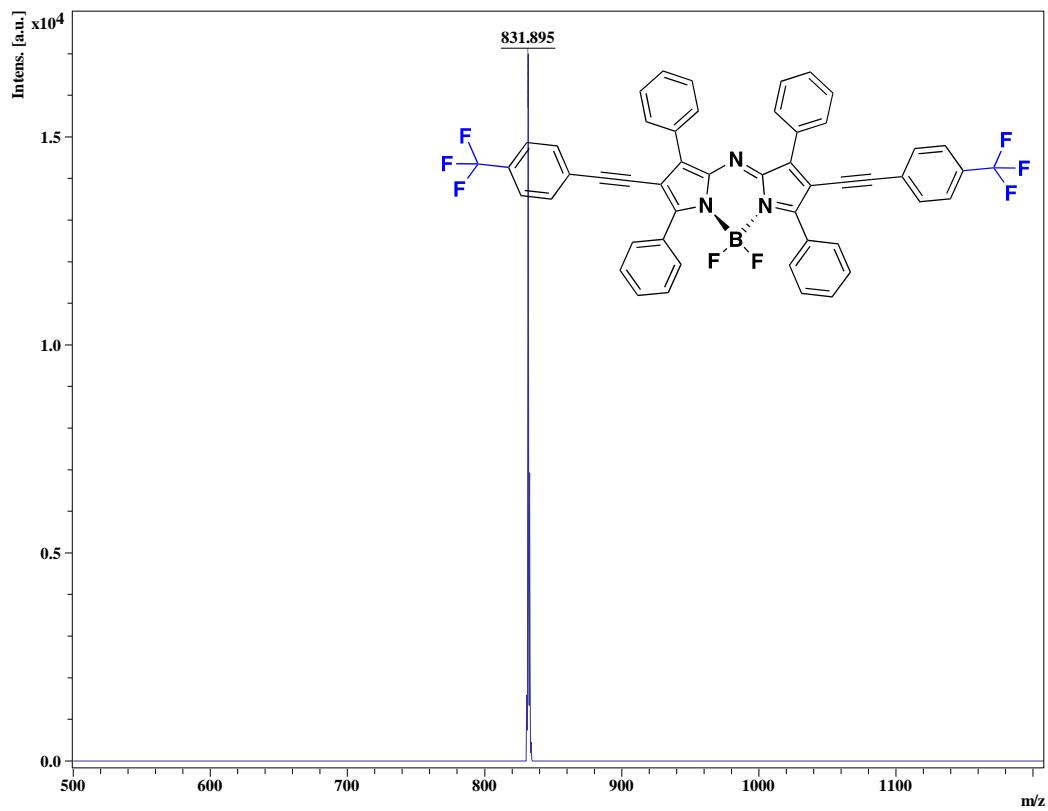

**Figure S24** MALDI-TOF MS of BF<sub>2</sub>(L4)

# Zn(L1)<sub>2</sub>

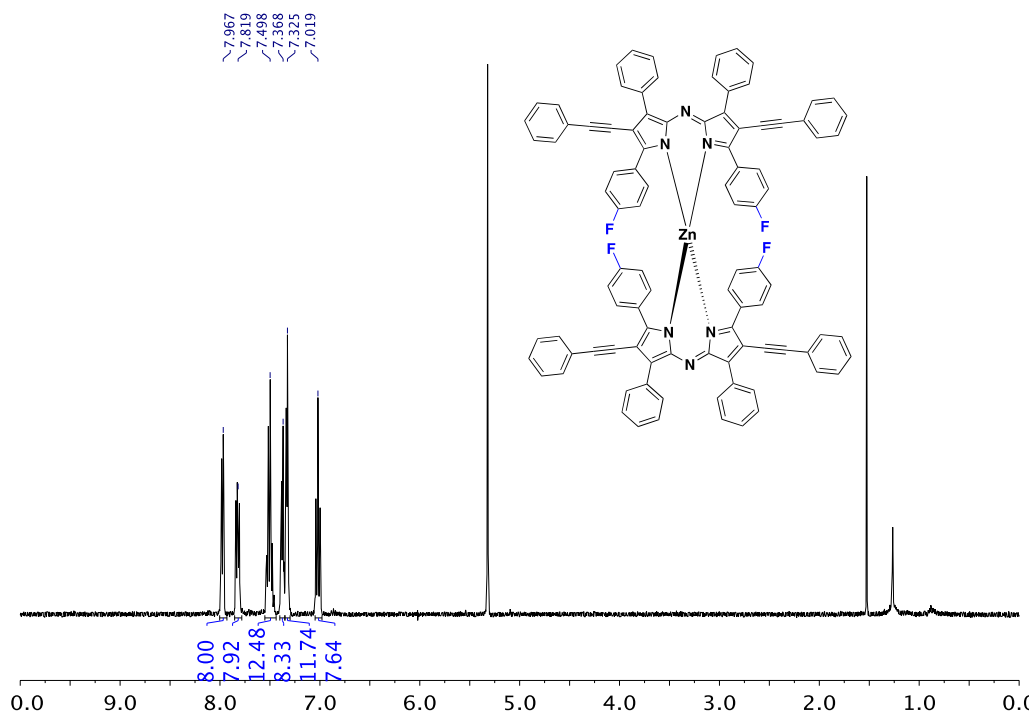

Figure S25 <sup>1</sup>H NMR of Zn(L1)<sub>2</sub>

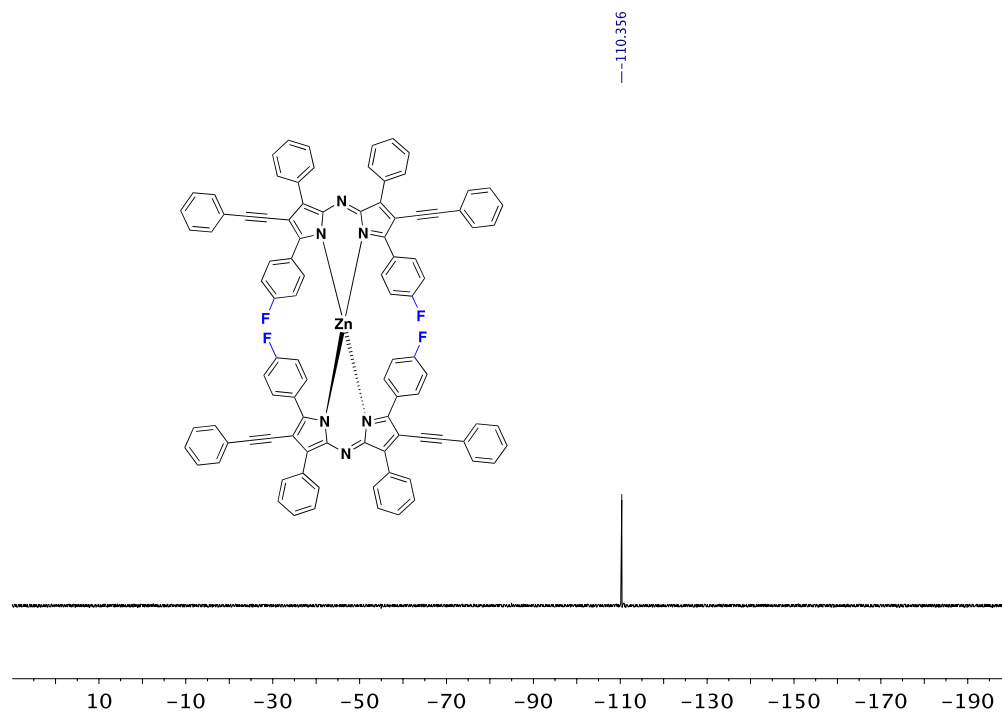

Figure S26 <sup>19</sup>F NMR of Zn(L1)<sub>2</sub>



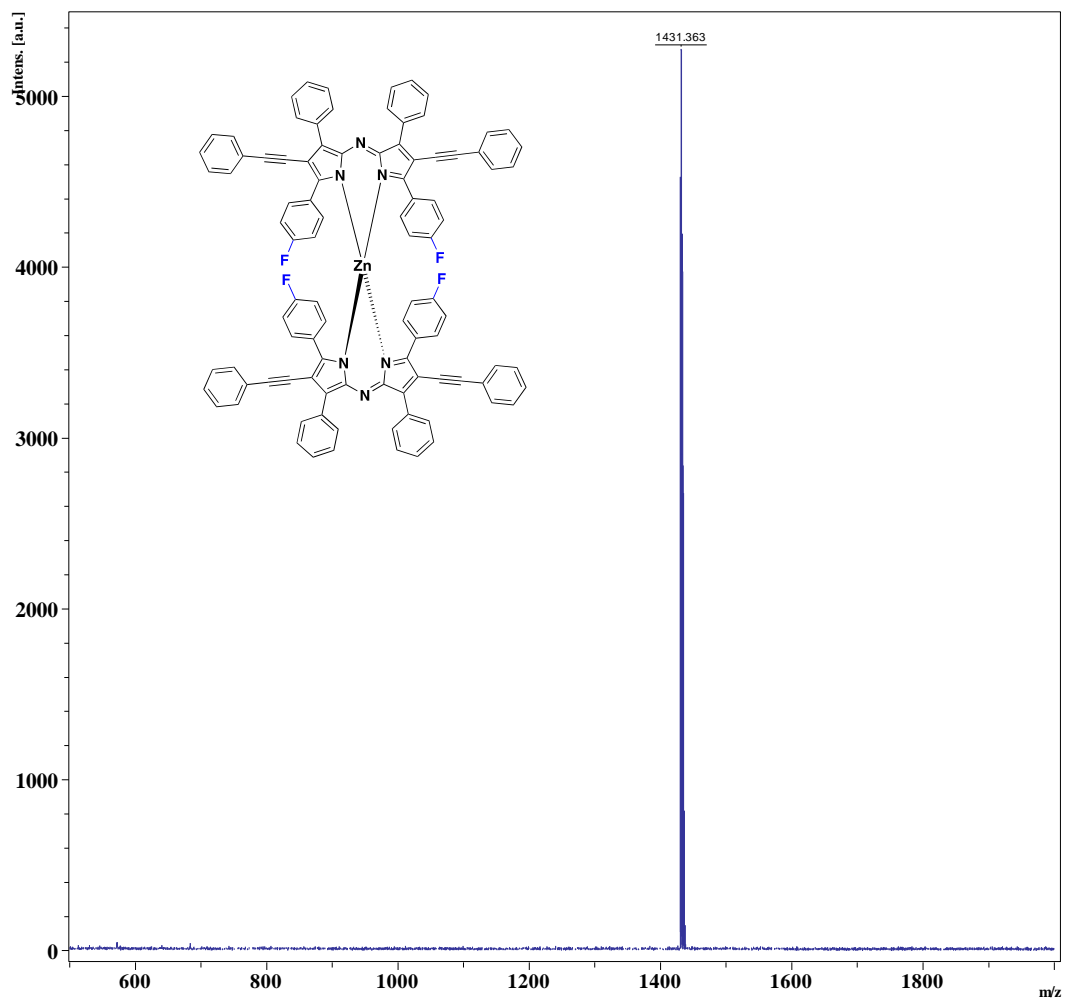

Figure S27 MALDI-TOF MS of Zn(L1)<sub>2</sub>

# Zn(L2)<sub>2</sub>

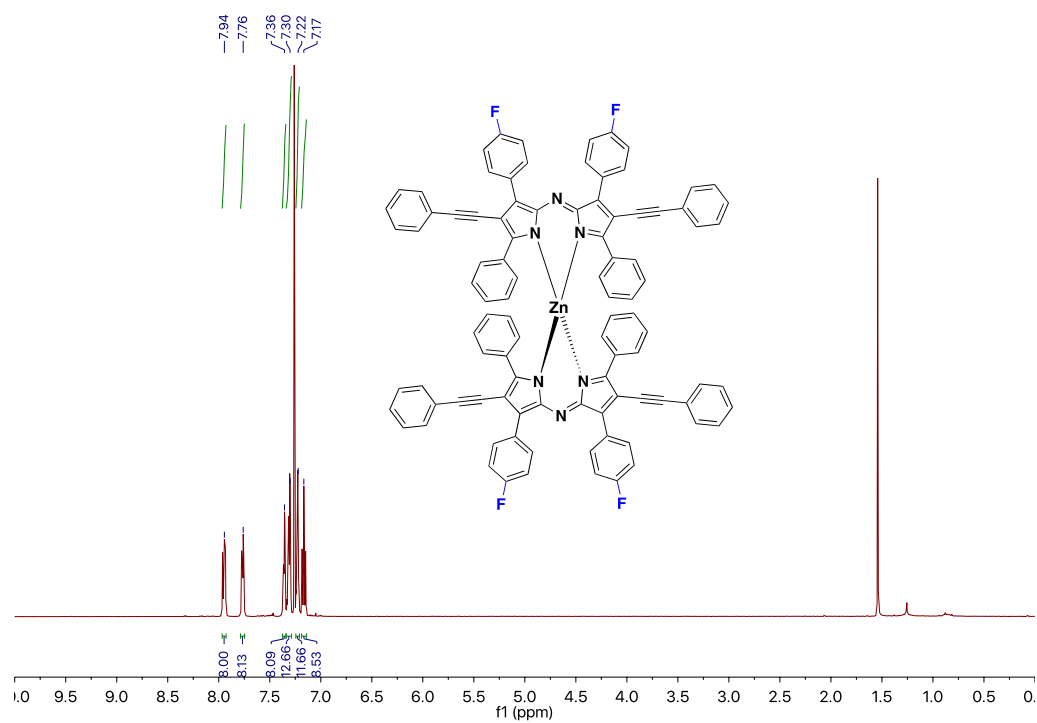

Figure S28 <sup>1</sup>H NMR of Zn(L2)<sub>2</sub>

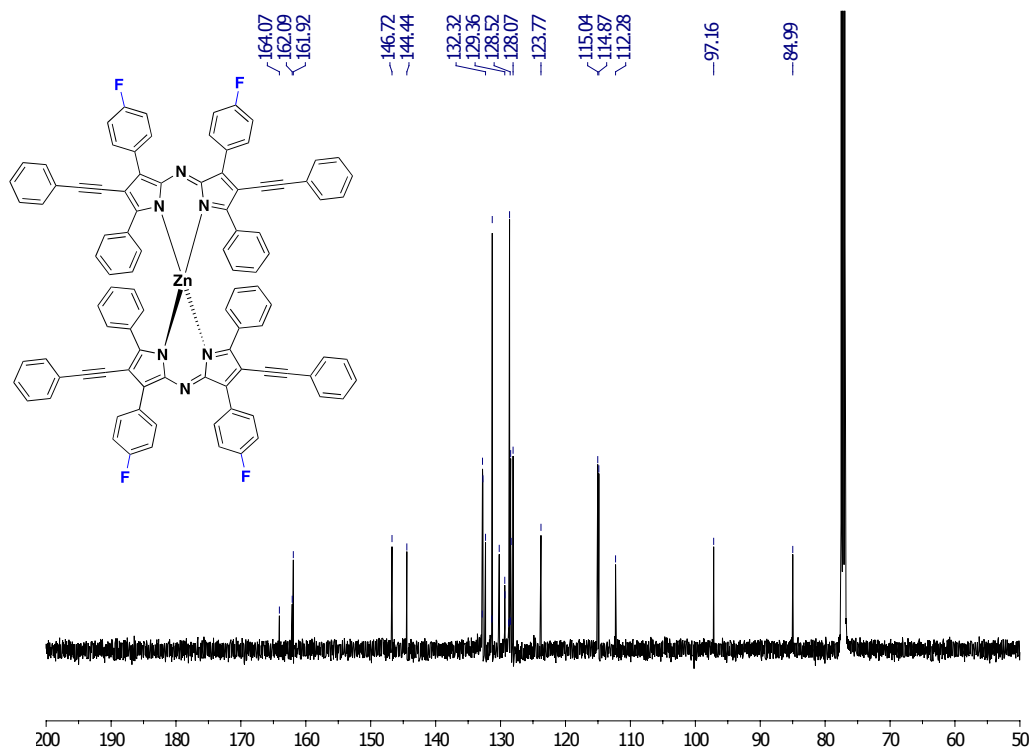

Figure S29 <sup>13</sup>C NMR of Zn(L2)<sub>2</sub>

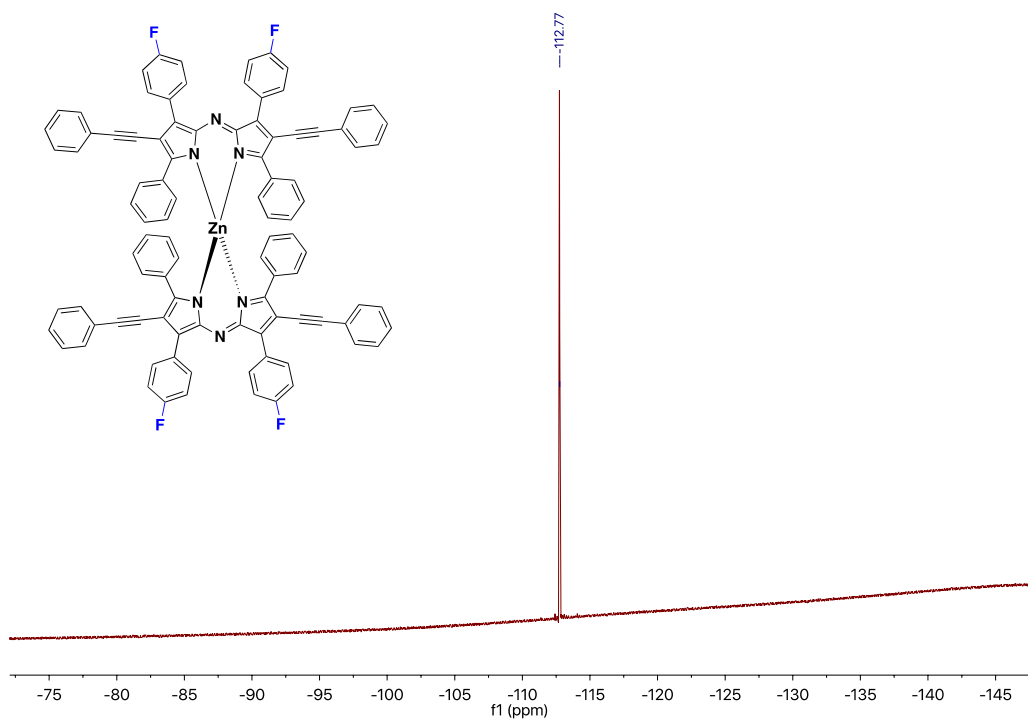

**Figure S30**  $^{19}F$  NMR of  $Zn(L2)_2$

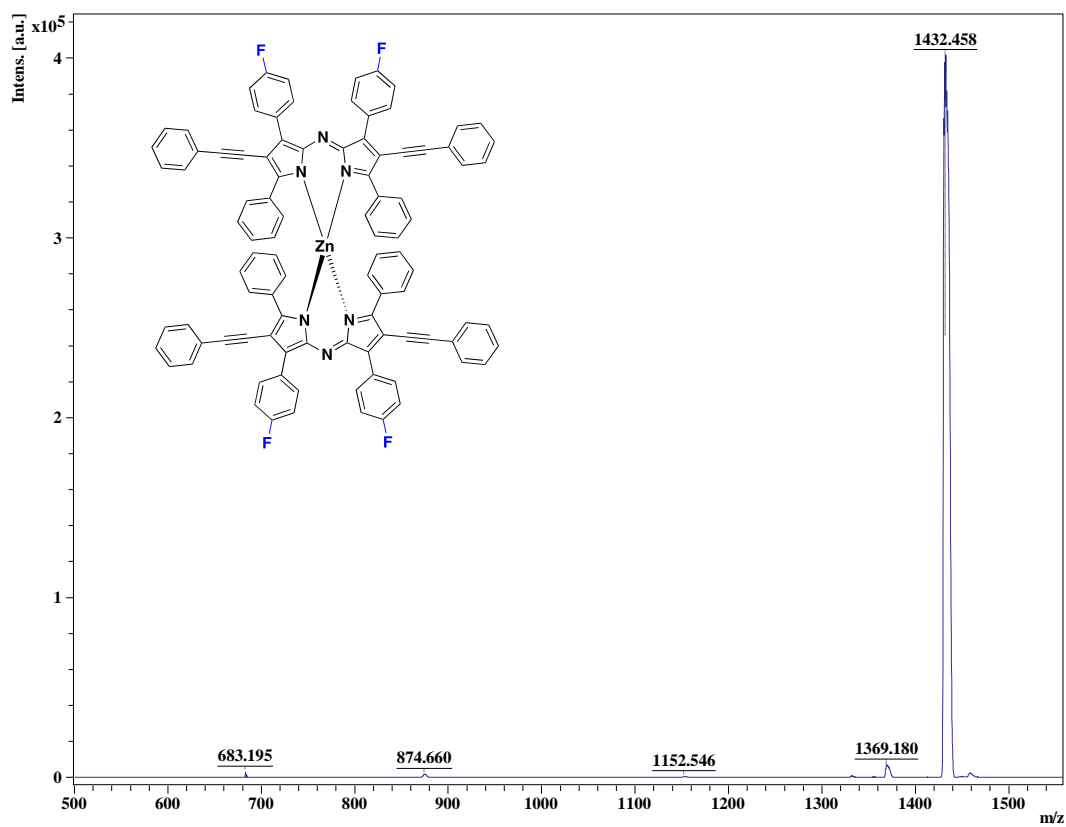

**Figure S31** MALDI-TOF MS of  $Zn(L2)_2$

### Zn(L3)<sub>2</sub>

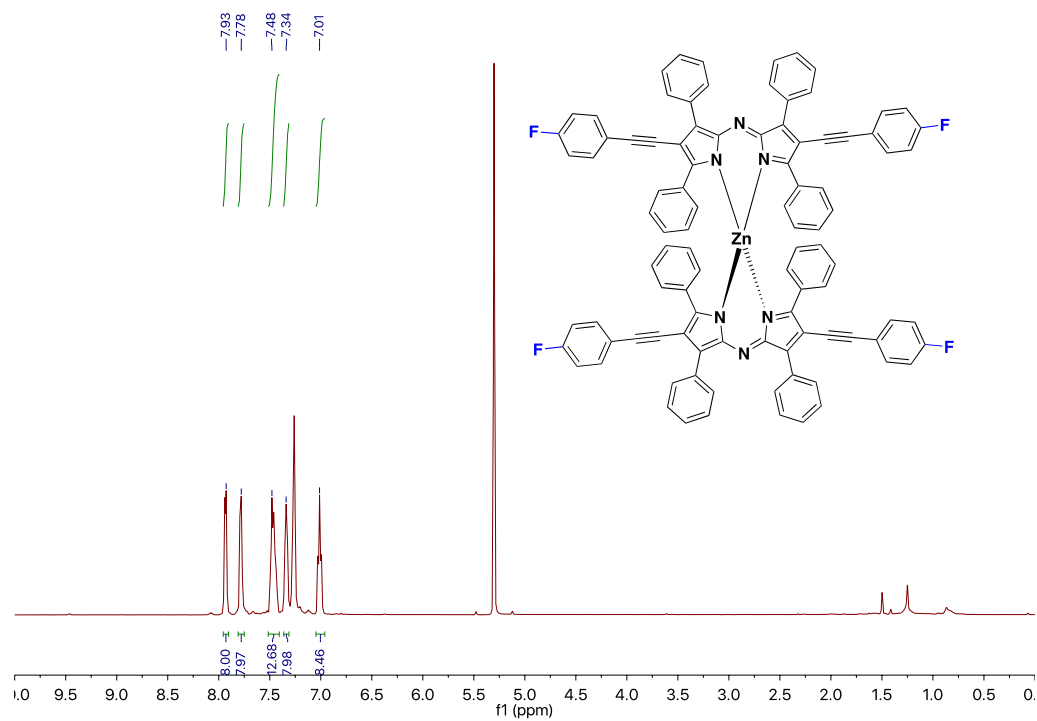

Figure S32 <sup>1</sup>H NMR of Zn(L3)<sub>2</sub>

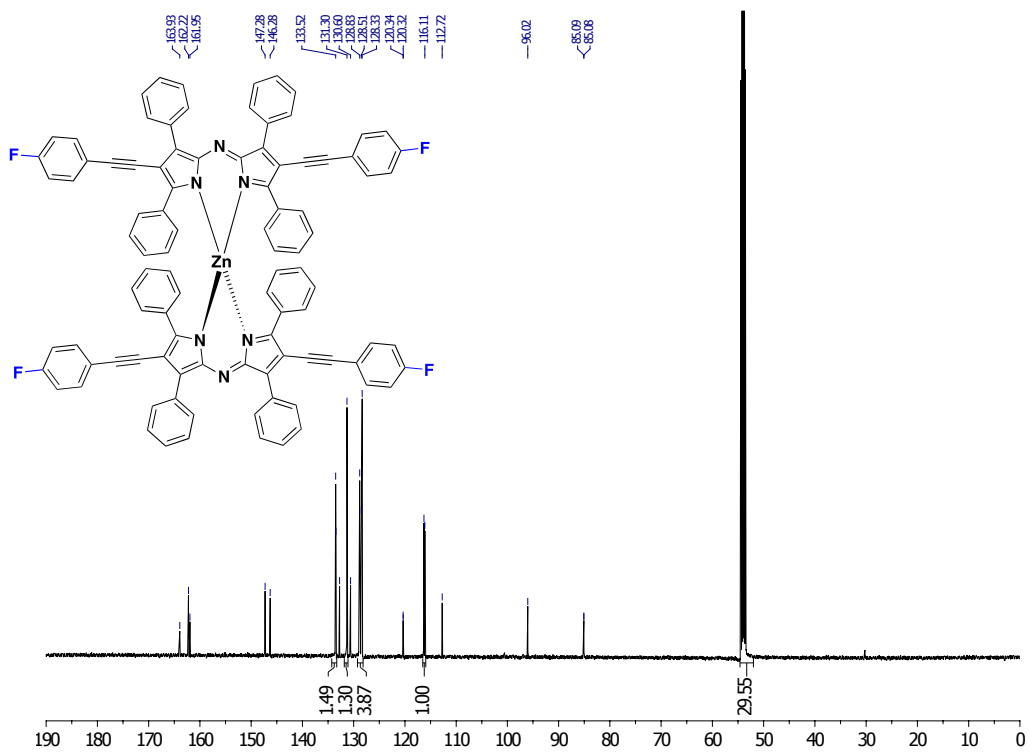

Figure S33 <sup>13</sup>C NMR of Zn(L3)<sub>2</sub>

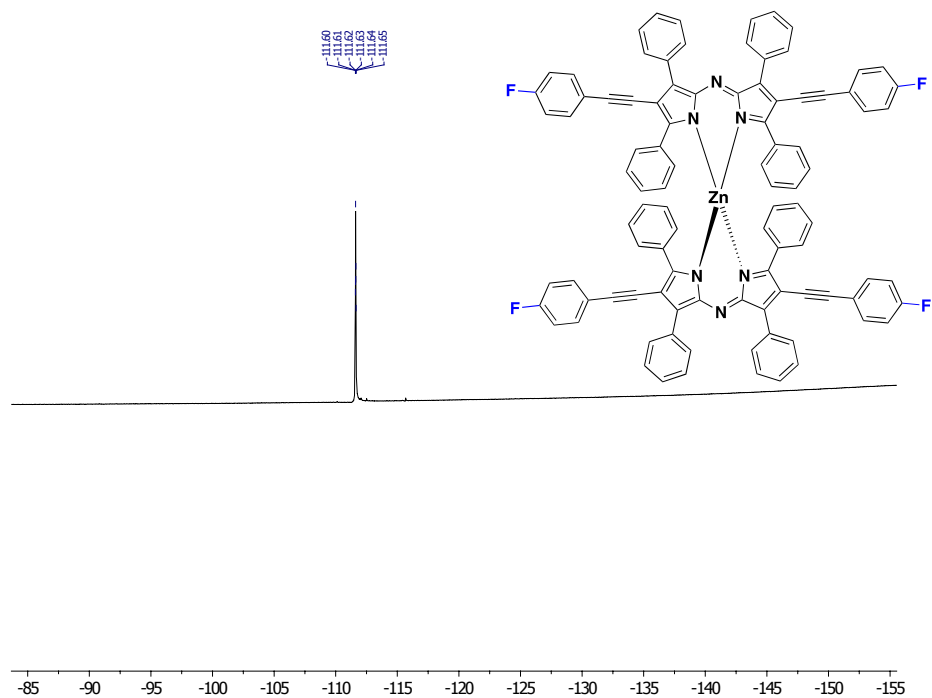

Figure S34  $^{19}\text{F}$  NMR of  $\text{Zn}(\text{L}3)_2$

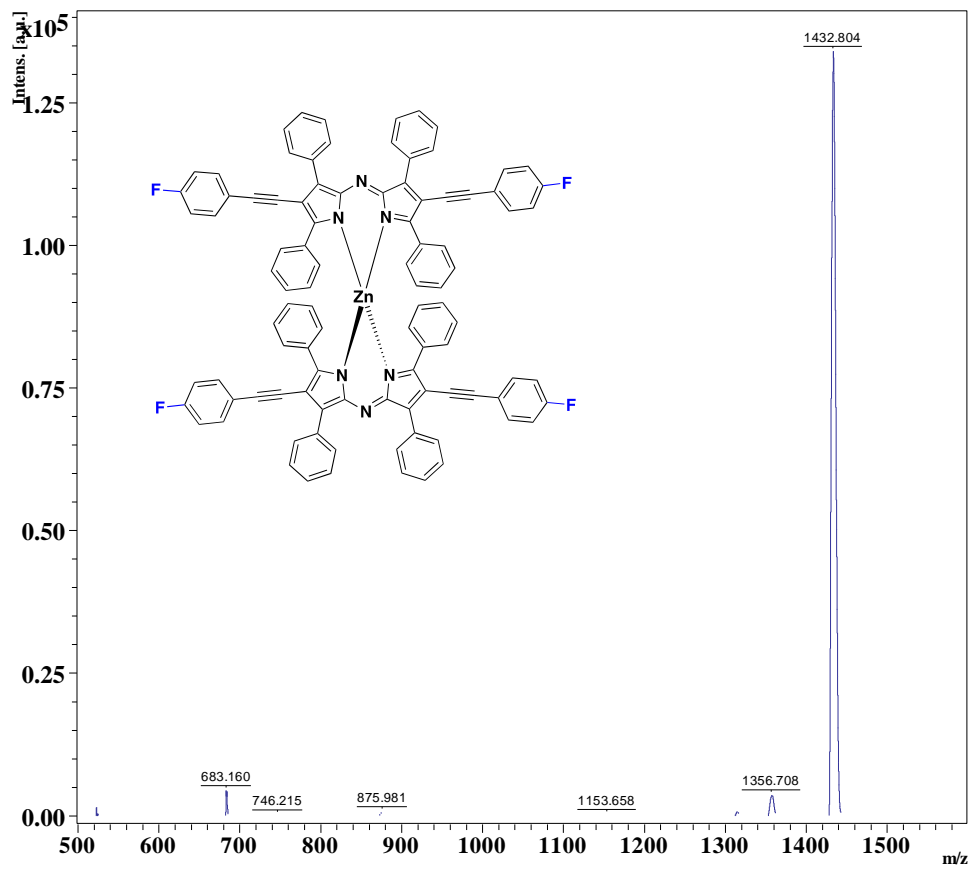

Figure S35 MALDI-TOF MS of  $\text{Zn}(\text{L}3)_2$

# Zn(L4)<sub>2</sub>

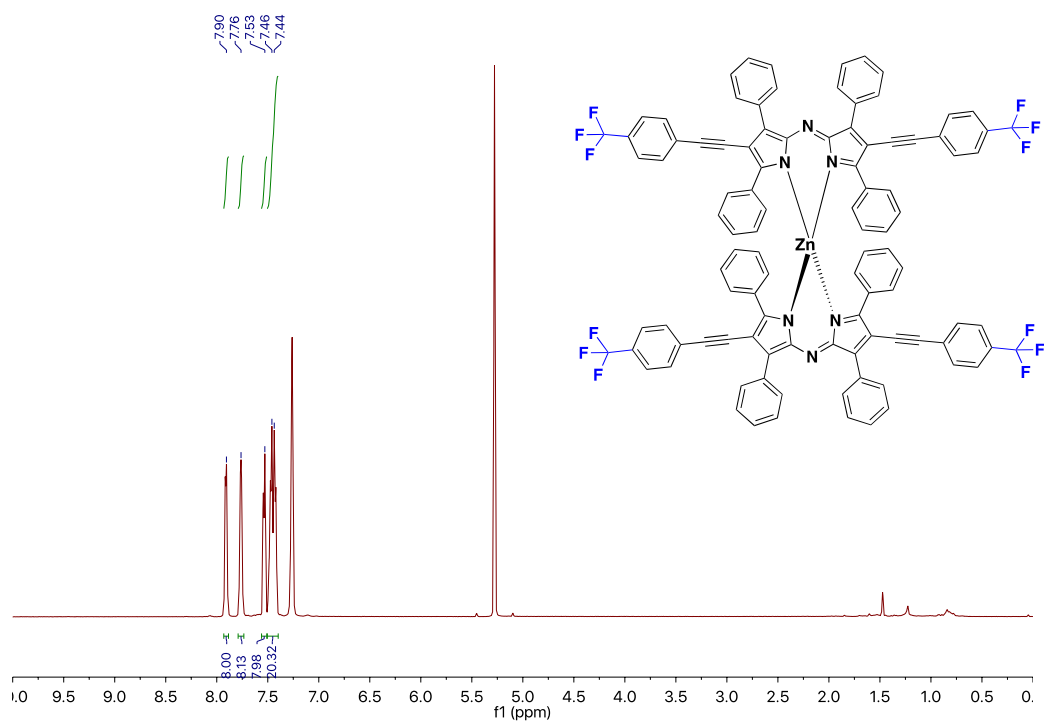

Figure S36 <sup>1</sup>H NMR of Zn(L4)<sub>2</sub>

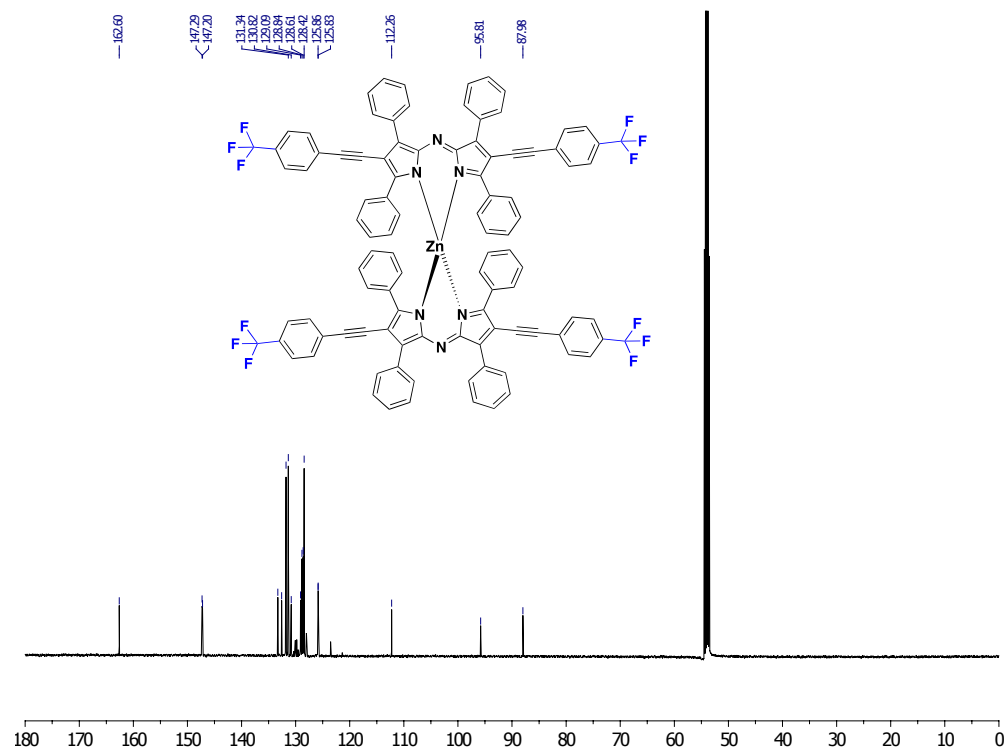

Figure S37 <sup>13</sup>C NMR of Zn(L4)<sub>2</sub>

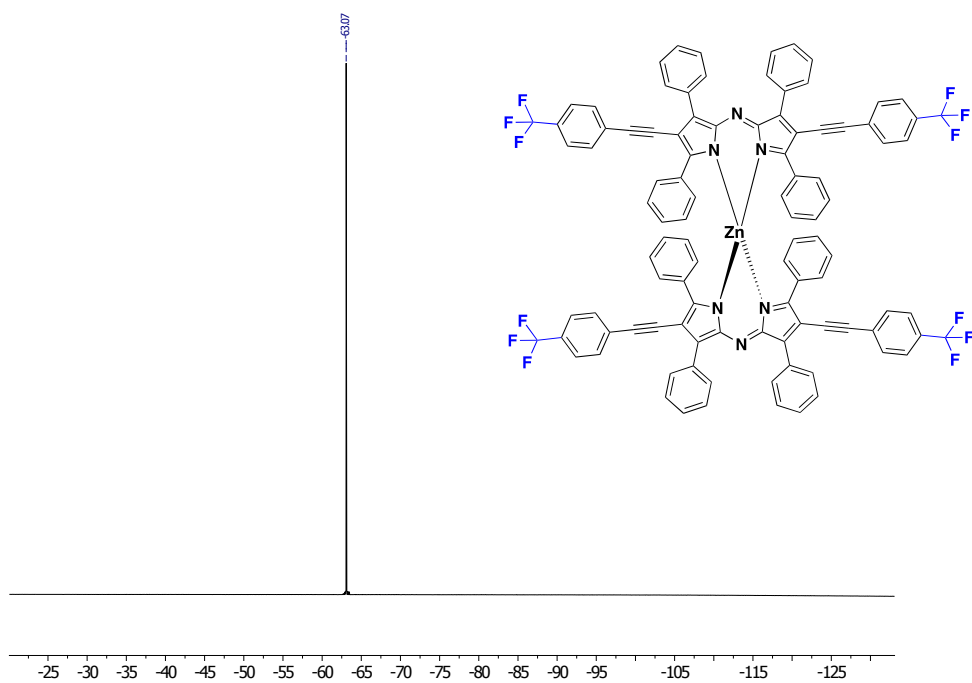

Figure S38 <sup>19</sup>F NMR of Zn(L4)<sub>2</sub>

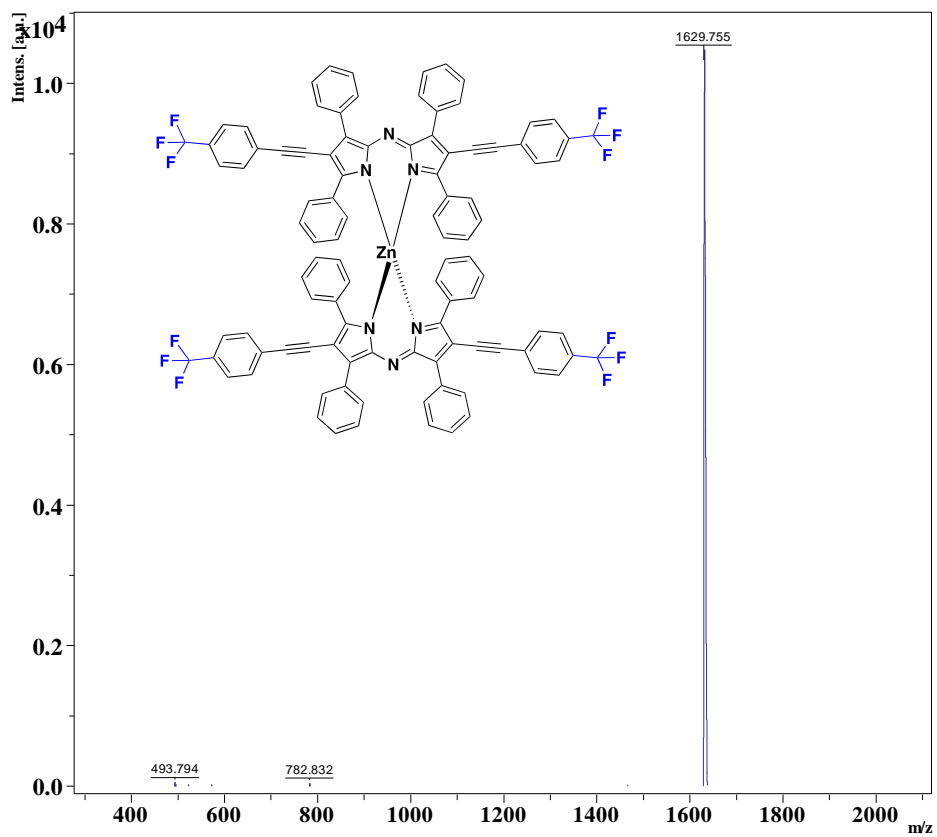

Figure S39 MALDI-TOF MS of Zn(L4)<sub>2</sub>
